# Supplementary material for: Protocol for the evaluation of a social franchising model to improve maternal health in Uttar Pradesh, India
Source: Springer Nature journal article supplement (doi:10.1186/s13012-015-0269-2), 2015-05-25

## Additional File 2: Results Chain of “Sky” Social Franchising Model

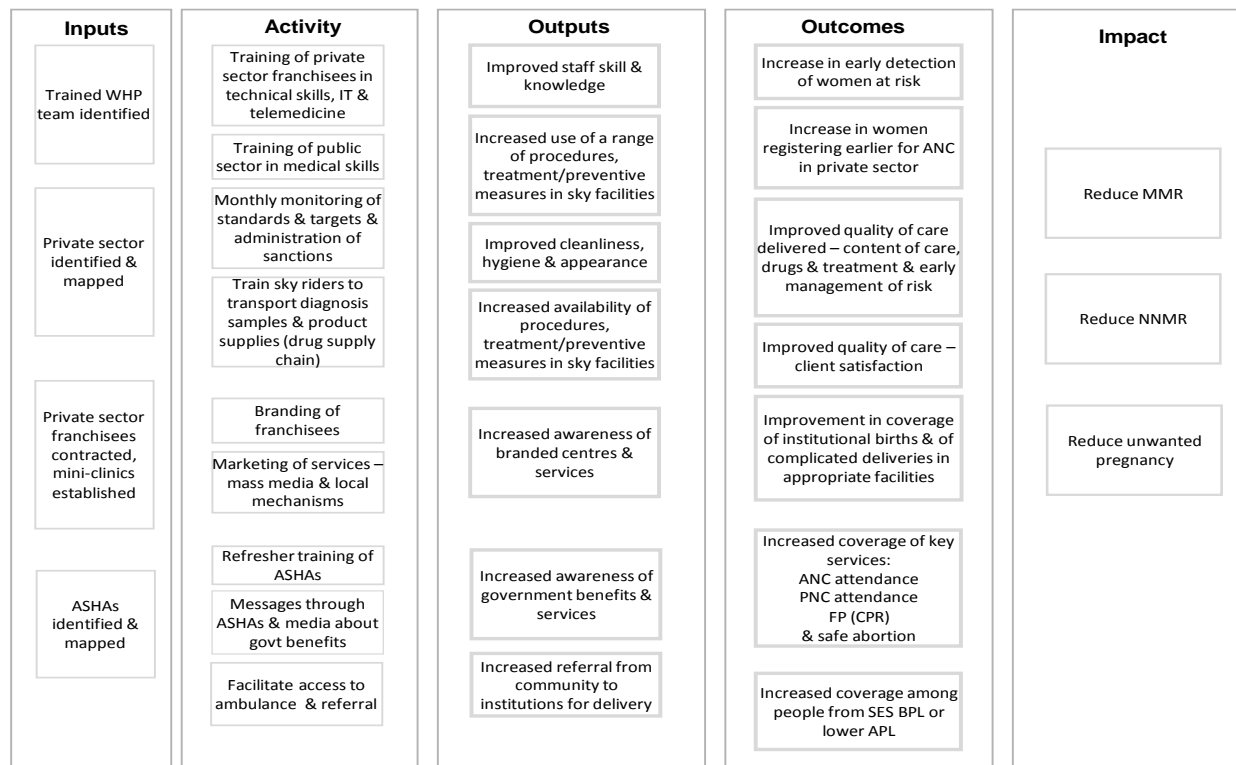

Supplement: MOESM2 [file 9773076]
