# Supplementary material for: Protocol for the evaluation of a social franchising model to improve maternal health in Uttar Pradesh, India
Source: Springer Nature journal article supplement (doi:10.1186/s13012-015-0269-2), 2015-05-25
Supplement: MOESM3 [file 9773076]

### Additional File 3: Demographic and health indicators in intervention districts

| Indicator                                             | Uttar Pradesh | Kannauj | Kanpur Nagar | Kanpur Dehat |
|-------------------------------------------------------|---------------|---------|--------------|--------------|
| <i>A. Demographic indicators</i>                      |               |         |              |              |
| Population (in millions)                              | 199.8         | 1.7     | 4.6          | 1.8          |
| Rural population (%)                                  | 78            | 83      | 34           | 90           |
| Literacy (%)                                          | 57            | 61      | 71           | 65           |
| Fertility (lifetime)                                  | 3.3           | 3.7     | 2.6          | 3.2          |
| Maternal mortality ratio (per 100,000)                | 345           | 267     | 267          | 267          |
| Neonatal mortality (per 1,000)                        | 50            | 55      | 24           | 43           |
| <i>B. Health intervention coverage indicators</i>     |               |         |              |              |
| Current use of modern method of family planning       | 31.8          | 23.2    | 39.7         | 38.6         |
| ANC 3+ visit                                          | 29.6          | 14.5    | 51.0         | 32.3         |
| Mothers who received at least TT injection            | 80.9          | 78.4    | 83.0         | 82.4         |
| Mothers who took IFA more than 100 days               | 6.5           | 4.0     | 19.2         | 5.8          |
| Mothers whose blood pressure was taken                | 25.0          | 12.3    | 57.2         | 19.0         |
| Institutional birth rate                              | 45.6          | 42.4    | 59.7         | 47.7         |
| Delivery at home conducted by SBA                     | 21.8          | 11.2    | 53.2         | 28.6         |
| Less than 24 hours stay in institution after delivery | 64.7          | 81.4    | 41.8         | 53.0         |
| Mother received post-natal checkup within 48 hours    | 68.4          | 48.8    | 66.5         | 72.7         |
| Newborn was checked within 24 hours of birth          | 68.2          | 49.9    | 71.7         | 74.4         |
| Children breastfed within one hour of birth           | 32.9          | 27.0    | 41.0         | 47.0         |

Notes: Sources are the Census 2011 and the Annual Health Survey 2010-11. The MMR estimates apply to groups of districts within the state due to sample size limitations. The three intervention districts fall within the same MMR grouping.
